# Supplementary material for: Wearing Masks Generates Approach Motivation in Times of COVID-19
Source: Research Square preprint supplement (doi:10.21203/rs.3.rs-8017396/v1), 2025-12-11
Supplement: Supplementary file 1 [file ad673270b4a333d7c8d5bcc8.docx]

Supplementary information for

**Wearing Masks Generates Approach Motivation in Times of COVID-19**

**Jiakun Liu1, 2#, Jiajia Yang1 #, Zhonghua Hu1**

1. Institute of Brain and Psychological Sciences, Sichuan Normal University, Chengdu, PR China
2. Department of Psychology, Fudan University, Handan Road 220, Shanghai 200433, China

Correspondence to:

Zhonghua Hu, Ph.D. (ORCID: 0000-0002-9213-457X)

Institute of Brain and Psychological Sciences, Sichuan Normal University, Chengdu, 610068, PR China, E-mail: [huzhonghua2000@163.com](mailto:huzhonghua2000@163.com)

**Note:** Jiakun Liu and Jiajia Yang have contributed equally to this study.

Table S1 ANOVA of FAS for other channels in brain area

| Brain area | Channel |  | F | p | ηp² |
| --- | --- | --- | --- | --- | --- |
| Inferior frontal gyrus | channels 2, 4 | face type | 1.42 | 0.248 | 0.07 |
|  | gaze deviation | 1.65 | 0.206 | 0.08 |
|  | face type × 3 gaze deviation | 0.126 | 0.881 | 0.007 |
| Frontal cortex | channels 10, 21 | face type | 0.123 | 0.729 | 0.006 |
|  | gaze deviation | 0.023 | 0.977 | 0.001 |
|  | face type × 3 gaze deviation | 1.622 | 0.211 | 0.079 |
| channels 11, 20 | face type | 0.352 | 0.56 | 0.018 |
|  | gaze deviation | 0.161 | 0.852 | 0.008 |
|  | face type × 3 gaze deviation | 0.777 | 0.467 | 0.039 |
| Frontal lobe | channels 15, 18 | face type | 0.016 | 0.9 | 0.001 |
|  |  | gaze deviation | 0.077 | 0.926 | 0.004 |
|  |  | face type × 3 gaze deviation | 0.874 | 0.426 | 0.044 |
| Dorsolateral prefrontal lobe | channels 13, 17 | face type | 0.906 | 0.353 | 0.046 |
|  | gaze deviation | 0.015 | 0.985 | 0.001 |
|  | face type × 3 gaze deviation | 0.496 | 0.613 | 0.025 |
| channels 14, 16 | face type | 0.356 | 0.558 | 0.018 |
|  | gaze deviation | 0.137 | 0.873 | 0.007 |
|  | face type × 3 gaze deviation | 0.298 | 0.744 | 0.015 |
| channels 26, 33 | face type | 0.387 | 0.541 | 0.02 |
|  | gaze deviation | 3.041 | 0.06 | 0.138 |
|  | face type × 3 gaze deviation | 0.313 | 0.713 | 0.016 |

Table S2 Correlation between FAS for non-masked and masked faces and self-assessment questionnaires

|  |  | *r* | *p* |
| --- | --- | --- | --- |
| Non - masked face | The scores of SDS | 0.152 | 0.522 |
| The scores of SIAS | -.493 | 0.027 |
| Q1 | 0.35 | 0.13 |
| Q2 | 0.058 | 0.808 |
| Q3 | 0.372 | 0.106 |
| Q$ | 0.063 | 0.793 |
| Q% | 0.144 | 0.545 |
| Q6 | 0.1 | 0.676 |
| Masked face | The scores of SDS | 0.051 | 0.831 |
| The scores of SIAS | -0.065 | 0.785 |
| Q1 | 0.062 | 0.795 |
| Q2 | 0.113 | 0.635 |
| Q3 | 0.327 | 0.16 |
| Q$ | 0.054 | 0.82 |
| Q% | -0.075 | 0.752 |
| Q6 | 0.133 | 0.576 |
